# Supplementary material
Source: ML conference proceedings conference paper supplement (https://proceedings.neurips.cc/paper_files/paper/2015/hash/2de5d16682c3c35007e4e92982f1a2ba-Abstract.html)
Supplement: Supplementary file [file 2de5d16682c3c35007e4e92982f1a2ba-Supplemental.zip]

---

# Natural Neural Networks: Supplemental Material

---

Guillaume Desjardins, Karen Simonyan, Razvan Pascanu, Koray Kavukcuoglu  
{gdesjardins, simonyan, razp, korayk}@google.com  
Google DeepMind, London

This supplementary material provides the experimental details for Section 4.

## 4.2 Unsupervised Learning

The model consists of a dense 8-layer auto-encoder, trained to minimize reconstruction error on the MNIST dataset. The encoder is composed of 4 densely connected sigmoidal layers, with a number of hidden units per layer in  $\{1k, 500, 250, 30\}$ , and a symmetric (untied) decoder. Hyper-parameters were selected by grid search, based on training error, with the following grid specifications: training batch size in  $\{32, 64, 128, 256\}$ , fixed learning rates in  $\{10^{-1}, 10^{-2}, 10^{-3}\}$  and momentum term in  $\{0, 0.9\}$ . For RMSprop, we further tuned the moving average coefficient in  $\{0.99, 0.999\}$  and the regularization term controlling the maximum scaling factor in  $\{0.1, 0.01\}$ . For PRONG, we fixed the natural reparametrization to  $T = 10^3$ , using  $N_s = 100$  samples (i.e. they were not optimized for wallclock time).

## 4.3 Supervised Learning

**CIFAR-10** The model used for our CIFAR experiments consists of 8 convolutional layers, having  $3 \times 3$  receptive fields.  $2 \times 2$  spatial max-pooling was applied between stacks of two convolutional layers, with the exception of the last convolutional layer which computes the class scores and is followed by global max-pooling and soft-max non-linearity. This particular choice of architecture was inspired by the VGG model [1] and held fixed across all experiments. The number of filters per layer is as follows: 64, 64, 128, 128, 256, 256, 512, 10.

Learning rates were decreased using a “waterfall” annealing schedule, which divided the learning rate by 10 when the validation error failed to improve by 1% over 4 consecutive evaluations. Validation error was estimated every  $10^3$  updates.

**ImageNet Challenge Dataset** For all optimization algorithms, we considered initial learning rates in  $\{10^{-1}, 10^{-2}, 10^{-3}\}$  and used a value of 0.9 as the momentum coefficient. For PRONG we tested reparametrization periods  $T \in \{10, 10^2, 10^3, 10^4\}$ , while typically using  $N_s = 0.1T$ . Eigenvalues were regularized by adding a small constant  $\epsilon \in \{1, 10^{-1}, 10^{-2}, 10^{-3}\}$  before scaling the eigenvectors. Regularization consisted of a simple  $L_2$  weight decay parameter of  $10^{-4}$  with no Dropout [2]. Note that this grid was not searched exhaustively due to its prohibitive cost.

We again employed a “waterfall” schedule, which divided the learning rate by 10 if the validation error did not improve by 1% after each epoch.

## References

- [1] K. Simonyan and A. Zisserman. Very deep convolutional networks for large-scale image recognition. In *International Conference on Learning Representations*, 2015.
- [2] Nitish Srivastava, Geoffrey Hinton, Alex Krizhevsky, Ilya Sutskever, and Ruslan Salakhutdinov. Dropout: A simple way to prevent neural networks from overfitting. *Journal of Machine Learning Research*, 2014.
